# Supplementary material
Source: Springer Nature journal article supplement (https://www.springermedizin.de/resource/supplementary/12943_2013_1250_MOESM10_ESM.pdf/9553056)

**Non-BRCA1 mutation**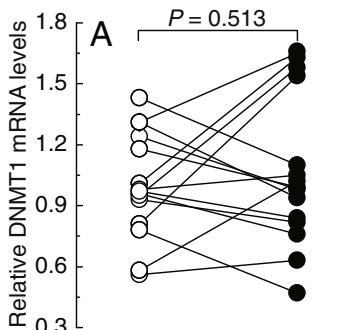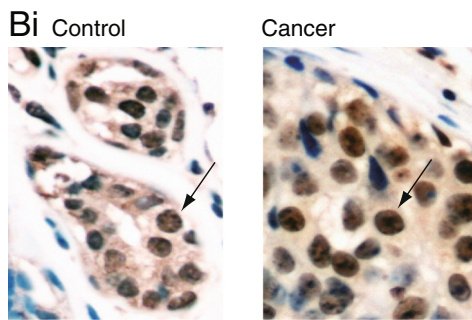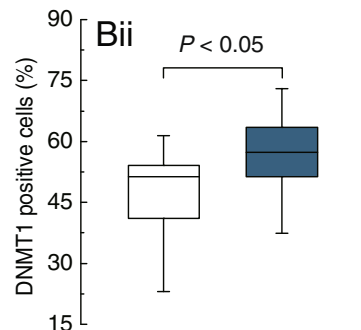**BRCA1 mutation**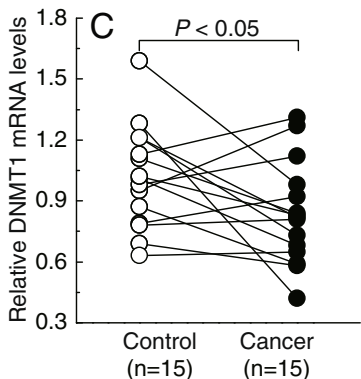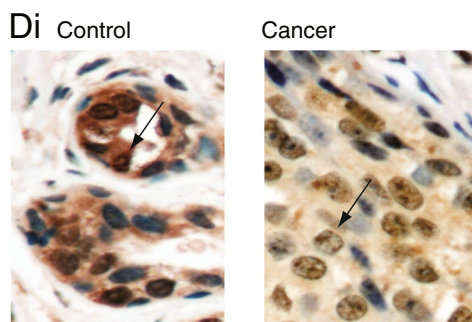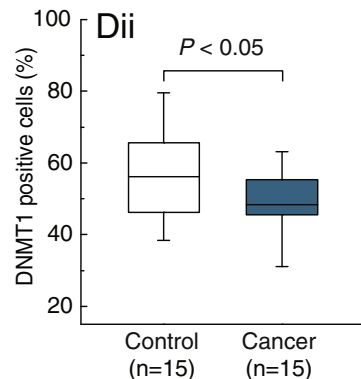

○ Control  $R = 0.137$   $P = 0.626$ ,  
● Cancer  $R = 0.032$   $P = 0.916$

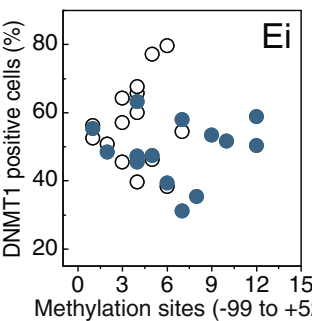

○ Control  $R = 0.468$   $P = 0.079$ ,  
● Cancer  $R = 0.052$   $P = 0.855$

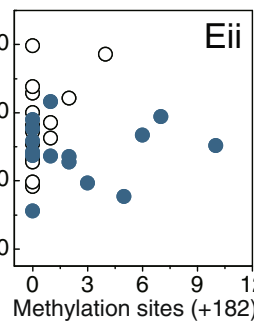

○ Control  $R = 0.467$   $P = 0.079$ ,  
● Cancer  $R = 0.428$   $P = 0.111$

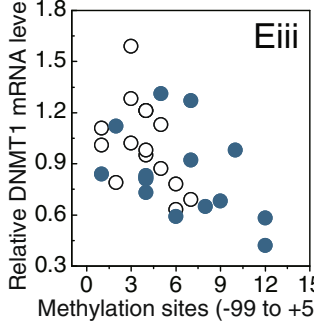

○ Control  $R = 0.181$   $P = 0.519$ ,  
● Cancer  $R = 0.755$   $P < 0.001$

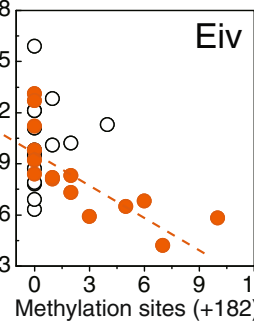

Supplement: MOESM10 [file 9553056]
